# Supplementary material
Source: MDPI journal article supplement (https://www.mdpi.com/2673-1924/1/4/14)
Supplement: s1 [file s1]

## Supplementary information

# Climate and local hydrography underlie recent regime shifts in plankton communities off Galicia (NW Spain)

Antonio Bode\*, Marta Álvarez, Luz García, M. Ángeles Louro, Mar Nieto-Cid, Manuel Ruíz-Villarreal, and Marta M. Varela

\*Correspondence: [antonio.bode@ieo.es](mailto:antonio.bode@ieo.es)

**Supplementary Table S1.** List of original series along with mean, sd and trends.

**Supplementary Table S2.** List of original series of plankton taxa along with mean, sd and trends.

**Supplementary Table S3.** Loadings of the first (PC1) and second (PC2) principal components of the PCA for each type of series.

**Supplementary Figure S1.** Pearsons'  $r$  correlations between series within each type.

**Supplementary Figure S2.** Time series of the second principal component of the PCA on each type of series.

**Supplementary Figure S3.** Cluster of annual series of phytoplankton or mesozooplankton taxa.
