# Supplementary material
Source: MDPI journal article supplement (https://www.mdpi.com/2673-1924/1/4/14)
Supplement: s1 [file s1]

**Supplementary Table S1.** List of original series along with mean, sd and trends. The number used to identify the series in the text and figures is also indicated. *S* and *Z*: statistics of the Mann-Kendall trend test. Significant ( $p < 0.05$ ) values were marked with a yellow background.

| series              | series no. | variable | units                                           | mean   | se    | Mann-Kendall test |          |          | Description                                                                |
|---------------------|------------|----------|-------------------------------------------------|--------|-------|-------------------|----------|----------|----------------------------------------------------------------------------|
|                     |            |          |                                                 |        |       | <i>S</i>          | <i>Z</i> | <i>p</i> |                                                                            |
| climate-meteorology | 1          | NAOm     | EOF mode                                        | 0.035  | 0.117 | -7                | 0.113    | 0.910    | NAO index annual mean                                                      |
|                     | 2          | NAO_DM   | EOF mode                                        | 0.669  | 0.227 | -1                | 0.000    | 1.000    | NAO index winter (Dec-Mar) mean                                            |
|                     | 3          | NAO_JA   | EOF mode                                        | 0.033  | 0.276 | -40               | 0.732    | 0.464    | NAO index summer (Jul-Aug) mean                                            |
|                     | 4          | AMOm     | °C                                              | 0.09   | 0.03  | 157               | 2.927    | 0.003    | Atlantic Multidecadal Oscillation annual mean                              |
|                     | 5          | GLOTIm   | °C                                              | 0.58   | 0.04  | 300               | 5.611    | 0.000    | Global Average Temperature and SST Anomalies                               |
|                     | 6          | PDOm     | °C                                              | 0.14   | 0.16  | -20               | 0.356    | 0.722    | Pacific Decadal Oscillation annual mean                                    |
|                     | 7          | AOm      | EOF mode                                        | 0.046  | 0.064 | -6                | 0.094    | 0.925    | Arctic Oscillation Index annual mean                                       |
|                     | 8          | ENNm     | °C                                              | 0.05   | 0.10  | -56               | 1.032    | 0.302    | El Niño 3.4 (North) annual mean                                            |
|                     | 9          | SUNSPm   | nº                                              | 77.1   | 11.3  | -120              | 2.232    | 0.026    | Sunspots annual mean                                                       |
|                     | 10         | PCOm     | x10 L m <sup>-2</sup>                           | 842.3  | 28.3  | 14                | 0.257    | 0.797    | Precipitation A Coruña AEMET annual mean                                   |
|                     | 11         | PCOsd    | x10 L m <sup>-2</sup>                           | 616.1  | 31.1  | 2                 | 0.020    | 0.984    | Precipitation A Coruña AEMET annual sd                                     |
|                     | 12         | PSCOm    | x10 L m <sup>-2</sup>                           | 806.3  | 44.3  | 56                | 1.087    | 0.277    | Precipitation A Coruña AEMET spring (Feb-May) mean                         |
|                     | 13         | PSCOsd   | x10 L m <sup>-2</sup>                           | 504.7  | 41.4  | 15                | 0.277    | 0.782    | Precipitation A Coruña AEMET spring (Feb-May) sd                           |
|                     | 14         | UIm      | m <sup>3</sup> s <sup>-1</sup> km <sup>-1</sup> | -264.0 | 29.7  | -31               | 0.563    | 0.574    | Upwelling index (Rias Altas) annual mean                                   |
|                     | 15         | UIsd     | m <sup>3</sup> s <sup>-1</sup> km <sup>-1</sup> | 1741.0 | 44.2  | 48                | 0.882    | 0.378    | Upwelling index (Rias Altas) annual sd                                     |
|                     | 16         | Ulu      | m <sup>3</sup> s <sup>-1</sup> km <sup>-1</sup> | 447.5  | 29.8  | -31               | 0.563    | 0.574    | Upwelling index - upwelling (Rias Altas) annual mean of monthly means >0   |
|                     | 17         | Uld      | m <sup>3</sup> s <sup>-1</sup> km <sup>-1</sup> | -783.6 | 53.9  | -20               | 0.356    | 0.722    | Upwelling index - downwelling (Rias Altas) annual mean of monthly means <0 |

| series      | series no. | variable | units                             | mean   | se    | S    | Z     | p     | Description                                        |
|-------------|------------|----------|-----------------------------------|--------|-------|------|-------|-------|----------------------------------------------------|
| hydrography | 18         | t_0      | °C                                | 14.705 | 0.060 | 20   | 0.357 | 0.721 | water temperature - surface (0-5 m) annual mean    |
|             | 19         | t_m      | °C                                | 14.126 | 0.060 | 9    | 0.150 | 0.881 | water temperature annual mean water column (0-70m) |
|             | 20         | t_sd     | °C                                | 0.618  | 0.017 | 11   | 0.188 | 0.851 | water temperature annual sd water column (0-70m)   |
|             | 21         | S_0      |                                   | 35.294 | 0.053 | -10  | 0.169 | 0.866 | salinity - surface (0-5m) annual mean              |
|             | 22         | S_m      |                                   | 35.502 | 0.029 | 7    | 0.113 | 0.910 | salinity - annual mean water column (0-70m)        |
|             | 23         | S_sd     |                                   | 0.185  | 0.029 | 5    | 0.075 | 0.940 | salinity - annual sd water column (0-70m)          |
|             | 24         | NO3_0    | μM                                | 2.52   | 0.11  | 62   | 1.144 | 0.253 | nitrate - surface (0-5m)                           |
|             | 25         | NO3_m    | μM                                | 3.86   | 0.12  | 45   | 0.826 | 0.409 | nitrate - annual mean water column (0-70m)         |
|             | 26         | NO3_sd   | μM                                | 1.83   | 0.06  | 55   | 1.014 | 0.311 | nitrate - annual sd water column (0-70m)           |
|             | 27         | NO2_0    | μM                                | 0.23   | 0.01  | -9   | 0.151 | 0.880 | nitrite - surface (0-5m)                           |
|             | 28         | NO2_m    | μM                                | 0.30   | 0.01  | 38   | 0.695 | 0.487 | nitrite - annual mean water column (0-70m)         |
|             | 29         | NO2_sd   | μM                                | 0.13   | 0.00  | 135  | 2.535 | 0.011 | nitrite - annual sd water column (0-70m)           |
|             | 30         | PO4_0    | μM                                | 0.19   | 0.02  | 159  | 2.970 | 0.003 | phosphate- surface (0-5m)                          |
|             | 31         | PO4_m    | μM                                | 0.26   | 0.02  | 141  | 2.629 | 0.009 | phosphate - annual mean water column (0-70m)       |
|             | 32         | PO4_sd   | μM                                | 0.10   | 0.01  | 42   | 0.780 | 0.436 | phosphate - annual sd water column (0-70m)         |
|             | 33         | SiO4_0   | μM                                | 1.92   | 0.14  | 119  | 2.215 | 0.027 | silicate- surface (0-5m)                           |
|             | 34         | SiO4_m   | μM                                | 2.30   | 0.13  | 156  | 2.910 | 0.004 | silicate - annual mean water column (0-70m)        |
|             | 35         | SiO4_sd  | μM                                | 0.84   | 0.04  | 107  | 1.991 | 0.046 | silicate - annual sd water column (0-70m)          |
|             | 36         | O2_0     | mL O <sub>2</sub> L <sup>-1</sup> | 6.13   | 0.02  | -41  | 0.751 | 0.453 | disolved oxygen - surface (0-5m) annual mean       |
|             | 37         | O2_m     | mL O <sub>2</sub> L <sup>-1</sup> | 5.80   | 0.02  | -168 | 3.154 | 0.002 | disolved oxygen - annual mean water column (0-70m) |
|             | 38         | O2_sd    | mL O <sub>2</sub> L <sup>-1</sup> | 0.37   | 0.01  | 67   | 1.244 | 0.213 | disolved oxygen - annual sd water column (0-70m)   |
|             | 39         | Chla_0   | μg L <sup>-1</sup>                | 1.463  | 0.108 | 88   | 1.633 | 0.102 | chlorophyll-a - surface (0-5m) annual mean         |
|             | 40         | Chla_m   | μg L <sup>-1</sup>                | 1.020  | 0.059 | 87   | 1.614 | 0.107 | chlorophyll-a - annual mean water column (0-70m)   |

| series        | series no. | variable   | units                               | mean  | se    | S    | Z     | p     | Description                                                               |
|---------------|------------|------------|-------------------------------------|-------|-------|------|-------|-------|---------------------------------------------------------------------------|
| hydrography   | 41         | Chla_sd    | $\mu\text{g L}^{-1}$                | 0.688 | 0.046 | 55   | 1.013 | 0.311 | chlorophyll-a - annual sd water column (0-70m)                            |
|               | 42         | PP_0       | $\text{mg C m}^{-3} \text{ h}^{-1}$ | 10.48 | 1.16  | 137  | 2.552 | 0.011 | primary production ( $^{14}\text{C}$ ) - surface (0-5m) annual mean       |
|               | 43         | PP_m       | $\text{mg C m}^{-3} \text{ h}^{-1}$ | 7.67  | 0.82  | 140  | 2.607 | 0.009 | primary production ( $^{14}\text{C}$ ) - annual mean water column (0-40m) |
|               | 44         | PP_sd      | $\text{mg C m}^{-3} \text{ h}^{-1}$ | 5.97  | 0.63  | 146  | 2.720 | 0.007 | primary production ( $^{14}\text{C}$ ) - annual sd water column (0-40m)   |
|               | 45         | POC_0      | $\mu\text{M}$                       | 11.10 | 0.30  | 53   | 0.976 | 0.329 | particulate organic carbon - surface (0-5 m) annual mean                  |
|               | 46         | POC_m      | $\mu\text{M}$                       | 7.96  | 0.21  | -80  | 1.482 | 0.138 | particulate organic carbon - annual mean water column (0-70m)             |
|               | 47         | POC_sd     | $\mu\text{M}$                       | 3.65  | 0.19  | -25  | 0.450 | 0.652 | particulate organic carbon - annual sd water column (0-70m)               |
|               | 48         | PON_0      | $\mu\text{M}$                       | 1.44  | 0.04  | 15   | 0.263 | 0.793 | particulate organic nitrogen - surface (0-5m) annual mean                 |
|               | 49         | PON_m      | $\mu\text{M}$                       | 1.05  | 0.03  | -49  | 0.902 | 0.367 | particulate organic nitrogen - annual mean water column (0-70m)           |
|               | 50         | PON_sd     | $\mu\text{M}$                       | 0.48  | 0.02  | -59  | 1.090 | 0.276 | particulate organic nitrogen - annual sd water column (0-70m)             |
| phytoplankton | 51         | P_Dinoflag | $\text{cells mL}^{-1}$              | 61.1  | 5.8   | 4    | 0.059 | 0.953 | Dinoflagellate abundance                                                  |
|               | 52         | P_Diat     | $\text{cells mL}^{-1}$              | 404.0 | 54.8  | -126 | 2.470 | 0.014 | Diatom abundance                                                          |
|               | 53         | P_Cryp     | $\text{cells mL}^{-1}$              | 79.0  | 10.9  | -92  | 1.798 | 0.072 | Cryptophyceae abundance                                                   |

| series           | series no. | variable   | units                  | mean   | se     | S    | Z     | p     | Description                                                                                                        |
|------------------|------------|------------|------------------------|--------|--------|------|-------|-------|--------------------------------------------------------------------------------------------------------------------|
| phytoplankton    | 54         | P_Other-ph | cells mL <sup>-1</sup> | 31.2   | 11.6   | -52  | 1.008 | 0.314 | Other phytoplankton taxa (Prymnesiophyceae, Solenicola setigera, Crysiophyceae, Euglenophyceae, Mesodinium rubrum) |
|                  | 55         | P_Flag     | cells mL <sup>-1</sup> | 121.6  | 33.7   | 50   | 0.968 | 0.333 | Flagellate (8-10µm) abundance                                                                                      |
|                  | 56         | P_Phyto_to | cells mL <sup>-1</sup> | 716.4  | 77.0   | -68  | 1.324 | 0.186 | Total phytoplankton abundance                                                                                      |
| microzooplankton | 57         | M_Cope     | indiv. m <sup>-3</sup> | 6633.5 | 1025.8 | 3    | 0.042 | 0.967 | Copepod abundance - microzooplankton                                                                               |
|                  | 58         | M_Biva     | indiv. m <sup>-3</sup> | 771.1  | 132.0  | 29   | 0.584 | 0.559 | Bivalvia abundance - microzooplankton                                                                              |
|                  | 59         | M_Tuni     | indiv. m <sup>-3</sup> | 173.6  | 43.7   | -87  | 1.793 | 0.073 | Tunicata abundance - microzooplankton                                                                              |
|                  | 60         | M_Other_mi | indiv. m <sup>-3</sup> | 16.7   | 6.8    | -154 | 3.200 | 0.001 | Other microzooplankton taxa (Rotifera, Chaetognatha, Echinodermata, Bryozoa)                                       |
|                  | 61         | M_Cnid-Sip | indiv. m <sup>-3</sup> | 24.9   | 13.4   | -131 | 2.730 | 0.006 | Cnidaria and Siphonophora abundance - microzooplankton                                                             |
|                  | 62         | M_Other-cr | indiv. m <sup>-3</sup> | 26.1   | 8.1    | -26  | 0.522 | 0.602 | Other crustacean (eggs and larvae, Cladocera, Decapoda, Cirripedia) - microzooplankton                             |
|                  | 63         | M_Fora     | indiv. m <sup>-3</sup> | 74.1   | 20.2   | -69  | 1.418 | 0.156 | Foraminifera abundance - microzooplankton                                                                          |
|                  | 64         | M_Tint     | indiv. m <sup>-3</sup> | 91.5   | 19.1   | 39   | 0.792 | 0.428 | Tintinnida abundance - microzooplankton                                                                            |
|                  | 65         | M_Gast     | indiv. m <sup>-3</sup> | 100.0  | 18.4   | 5    | 0.083 | 0.934 | Gastropoda abundance - microzooplankton                                                                            |
|                  | 66         | M_Anne     | indiv. m <sup>-3</sup> | 42.4   | 5.8    | 7    | 0.125 | 0.900 | Annelida abundance - microzooplankton                                                                              |
|                  | 67         | M_Micro-to | indiv. m <sup>-3</sup> | 7973.6 | 1192.6 | 5    | 0.083 | 0.934 | Total microzooplankton                                                                                             |
| mesozooplankton  | 68         | E_Cope     | indiv. m <sup>-3</sup> | 2451.9 | 129.8  | 131  | 2.319 | 0.020 | Copepoda abundance - mesozooplankton                                                                               |
|                  | 69         | E_Tuni     | indiv. m <sup>-3</sup> | 51.1   | 4.4    | 42   | 0.732 | 0.464 | Tunicata abundance - mesozooplankton                                                                               |
|                  | 70         | E_Biva     | indiv. m <sup>-3</sup> | 131.0  | 24.7   | 149  | 2.641 | 0.008 | Bivalvia abundance - mesozooplankton                                                                               |

| series          | series no. | variable   | units                  | mean   | se    | S   | Z      | p     | Description                                                                                                                                                                                |
|-----------------|------------|------------|------------------------|--------|-------|-----|--------|-------|--------------------------------------------------------------------------------------------------------------------------------------------------------------------------------------------|
| mesozooplankton | 71         | E_Fish     | indiv. m <sup>-3</sup> | 8.1    | 0.7   | 86  | 1.517  | 0.129 | Fish eggs and larvae abundance – mesozooplankton                                                                                                                                           |
|                 | 72         | E_Euph     | indiv. m <sup>-3</sup> | 59.4   | 9.0   | 172 | 3.051  | 0.002 | Euphausiacea abundance - mesozooplankton                                                                                                                                                   |
|                 | 73         | E_Clad     | indiv. m <sup>-3</sup> | 179.7  | 17.1  | 161 | 2.855  | 0.004 | Cladocera abundance - mesozooplankton                                                                                                                                                      |
|                 | 74         | E_Gast     | indiv. m <sup>-3</sup> | 50.8   | 7.0   | 166 | 2.944  | 0.003 | Gastropoda abundance                                                                                                                                                                       |
|                 | 75         | E_Anne     | indiv. m <sup>-3</sup> | 4.1    | 0.5   | -8  | 0.125  | 0.900 | Annelida abundance - mesozooplankton                                                                                                                                                       |
|                 | 76         | E_Deca     | indiv. m <sup>-3</sup> | 32.7   | 3.4   | 63  | 1.106  | 0.269 | Decapoda abundance - mesozooplankton                                                                                                                                                       |
|                 | 77         | E_Chae     | indiv. m <sup>-3</sup> | 10.5   | 1.5   | 112 | 1.981  | 0.048 | Chaetognatha abundance - mesozooplankton                                                                                                                                                   |
|                 | 78         | E_Cirr     | indiv. m <sup>-3</sup> | 218.9  | 36.4  | 57  | 0.999  | 0.318 | Cirripedia abundance - mesozooplankton                                                                                                                                                     |
|                 | 79         | E_Bryo     | indiv. m <sup>-3</sup> | 9.7    | 1.1   | 0   | -0.018 | 0.986 | Bryozoa abundance - mesozooplankton                                                                                                                                                        |
|                 | 80         | E_Cnid     | indiv. m <sup>-3</sup> | 37.8   | 8.2   | 23  | 0.393  | 0.695 | Cnidaria, Siphonophora and Ctenophora - mesozooplankton                                                                                                                                    |
|                 | 81         | E_Fora     | indiv. m <sup>-3</sup> | 9.0    | 1.2   | -51 | 0.893  | 0.372 | Foraminifera abundance - mesozooplankton                                                                                                                                                   |
|                 | 82         | E_Other_me | indiv. m <sup>-3</sup> | 12.8   | 3.1   | 18  | 0.304  | 0.761 | Other mesozooplankton taxa (Tintinnida, Trematoda, Nemertea, Radiolaria, Rotifera, Cephalopoda, Cephalochordata, Echinodermata, Pteropoda, Cumacea, Mysida, Isopoda, Ostracoda, Amphipoda) |
|                 | 83         | E_Meso     | indiv. m <sup>-3</sup> | 3278.8 | 158.5 | 127 | 2.248  | 0.025 | Total mesozooplankton abundance                                                                                                                                                            |
|                 | 84         | E_BMZ      | mg m <sup>-3</sup>     | 26.8   | 1.4   | 97  | 1.713  | 0.087 | Mesozooplankton biomass                                                                                                                                                                    |
