# Supplementary material
Source: MDPI journal article supplement (https://www.mdpi.com/2673-1924/1/4/14)
Supplement: s1 [file s1]

**Supplementary Table S3.** Loadings of the first (PC1) and second (PC2) principal components of the PCA for each type of series. The highest positive and negative loadings for each component are marked with red and blue shading, respectively. Numbers and accronims for series as in Supplementary Tables S1 and S2. The percent contribution to total variance for each component (% var) is also indicated.

| series        | series no. | variable   | PC 1   | PC 2   |
|---------------|------------|------------|--------|--------|
| climate       | 2          | NAO_DM     | 0.245  | 0.164  |
|               | 3          | NAO_JA     | 0.334  | 0.280  |
|               | 4          | AMOm       | -0.490 | 0.285  |
|               | 5          | GLOTLm     | -0.392 | 0.583  |
|               | 6          | PDOm       | 0.295  | 0.487  |
|               | 7          | AOm        | 0.260  | 0.120  |
|               | 8          | ENNm       | 0.350  | 0.344  |
|               | 9          | SUNSPm     | 0.327  | -0.244 |
|               | 10         | PCOm       | -0.102 | -0.175 |
|               | 12         | PSCOm      | -0.183 | 0.032  |
|               | 16         | Ulu        | 0.079  | 0.065  |
|               | 17         | Uld        | 0.026  | 0.086  |
|               |            | % var      | 33.250 | 22.832 |
| hydrography   | 19         | t_m        | -0.041 | 0.226  |
|               | 22         | S_m        | 0.166  | -0.576 |
|               | 25         | NO3_m      | 0.341  | -0.264 |
|               | 28         | NO2_m      | 0.048  | 0.487  |
|               | 31         | PO4_m      | 0.533  | -0.044 |
|               | 34         | SiO4_m     | 0.448  | 0.446  |
|               | 37         | O2_m       | -0.320 | -0.201 |
|               | 40         | Chla_m     | 0.194  | -0.017 |
|               | 43         | PP_m       | 0.349  | 0.047  |
|               | 46         | POC_m      | -0.227 | 0.193  |
|               | 49         | PON_m      | -0.232 | 0.170  |
|               |            | % var      | 43.596 | 19.577 |
| phytoplankton | 51         | P_Dinoflag | -0.034 | 0.636  |
|               | 52         | P_Diat     | -0.020 | 0.663  |
|               | 53         | P_Cryp     | 0.160  | 0.388  |
|               | 54         | P_Other-ph | 0.856  | -0.056 |
|               | 55         | P_Flag     | 0.489  | 0.042  |
|               |            | % var      | 36.836 | 29.535 |

| series           | series no. | variable   | PC 1   | PC 2   |
|------------------|------------|------------|--------|--------|
| microzooplankton | 57         | M_Cope     | 0.450  | 0.090  |
|                  | 58         | M_Biva     | 0.090  | 0.633  |
|                  | 59         | M_Tuni     | 0.282  | -0.364 |
|                  | 60         | M_Other_mi | 0.194  | -0.324 |
|                  | 61         | M_Cnid-Sip | 0.252  | -0.300 |
|                  | 62         | M_Other-cr | 0.319  | -0.080 |
|                  | 63         | M_Fora     | 0.435  | 0.051  |
|                  | 64         | M_Tint     | 0.368  | 0.159  |
|                  | 65         | M_Gast     | 0.344  | 0.423  |
|                  | 66         | M_Anne     | 0.253  | -0.223 |
|                  |            | % var      | 36.388 | 21.782 |
| mesozooplankton  | 68         | E_Cope     | 0.321  | -0.311 |
|                  | 69         | E_Tuni     | 0.289  | -0.139 |
|                  | 70         | E_Biva     | 0.409  | 0.122  |
|                  | 71         | E_Fish     | 0.265  | 0.022  |
|                  | 72         | E_Euph     | 0.295  | -0.441 |
|                  | 73         | E_Clad     | 0.343  | 0.326  |
|                  | 74         | E_Gast     | 0.384  | 0.163  |
|                  | 75         | E_Anne     | -0.008 | -0.050 |
|                  | 76         | E_Deca     | 0.215  | -0.262 |
|                  | 77         | E_Chae     | 0.253  | -0.134 |
|                  | 78         | E_Cirr     | 0.231  | 0.239  |
|                  | 79         | E_Bryo     | 0.088  | 0.261  |
|                  | 80         | E_Cnid     | 0.101  | 0.462  |
|                  | 81         | E_Fora     | -0.166 | 0.182  |
|                  | 82         | E_Other_me | 0.120  | 0.285  |
|                  |            | % var      | 42.115 | 14.624 |
