# Supplementary material
Source: MDPI journal article supplement (https://www.mdpi.com/2673-1924/1/4/14)
Supplement: s1 [file s1]

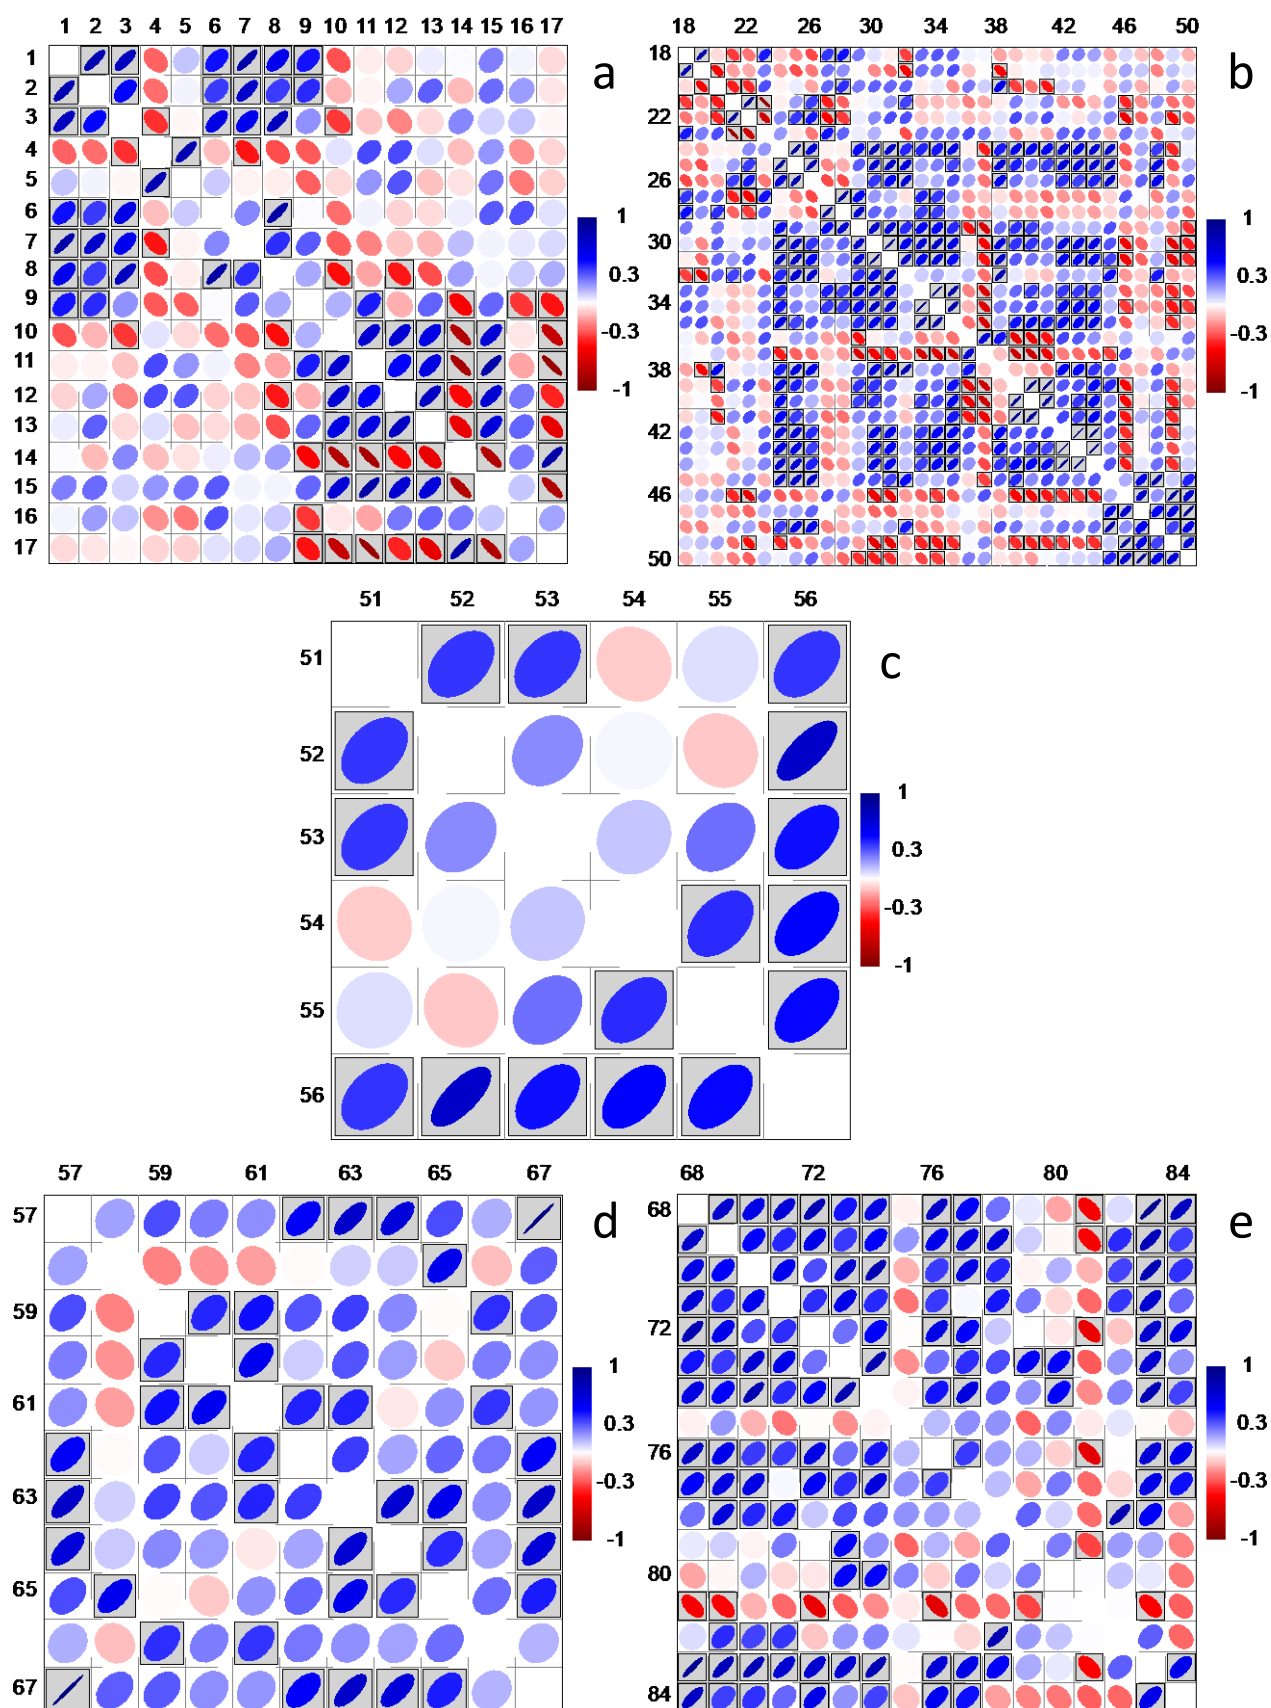

**Supplementary Figure S1.** Pearson's  $r$  correlations between series within each type. a: climate series, b: hydrography series, c: phytoplankton series, d: microzooplankton series; e: mesozooplankton series. The significant values ( $p < 0.05$ ) are indicated by boxes. The shape of each ellipse is proportional to the value of  $r$  and its orientation indicates the positive (right) or negative (left) sign. The numbers in the rows and columns identify the series as listed in Supplementary Table S1.

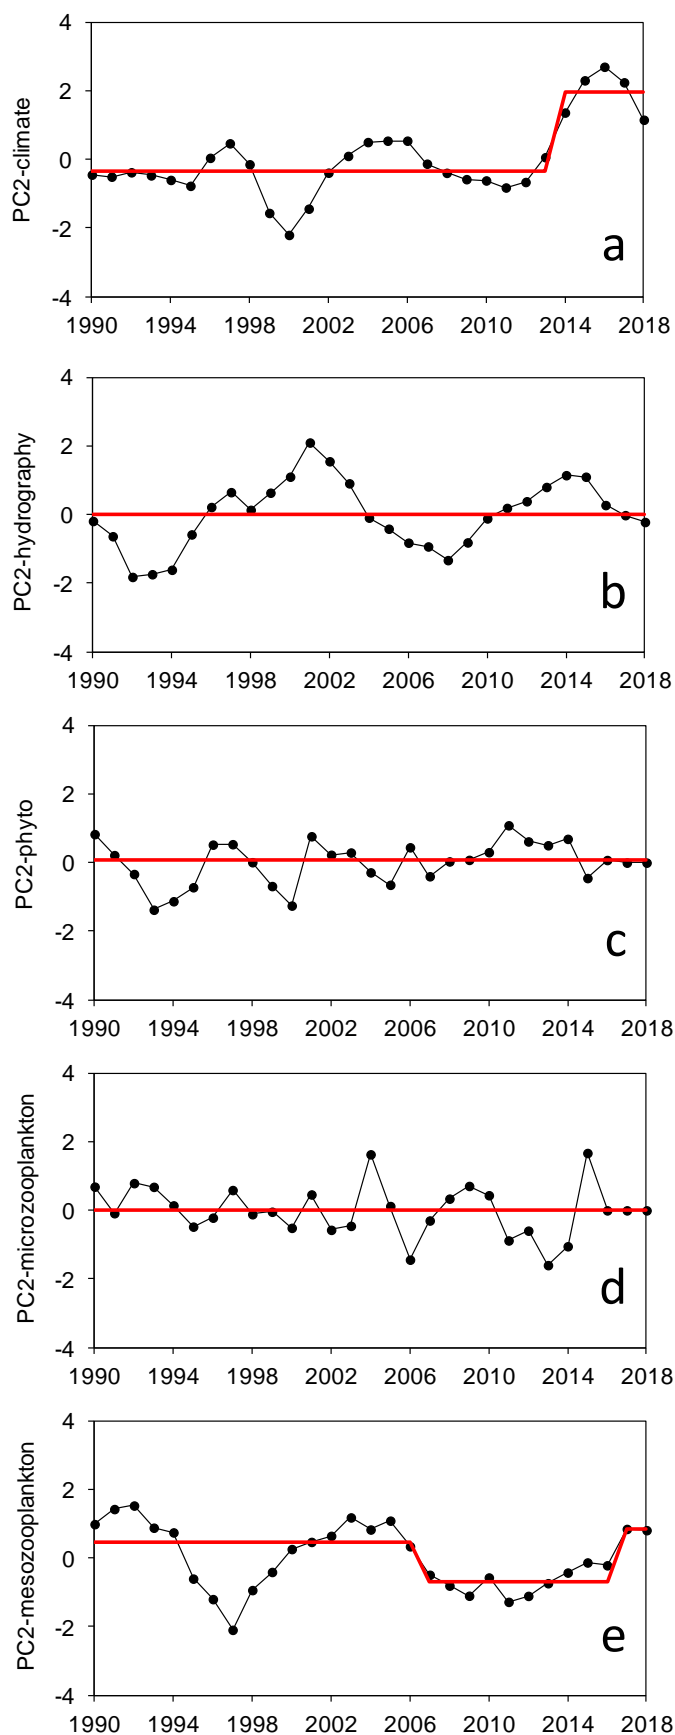

**Supplementary Figure S2.** Time series of the second principal component of the PCA on each type of series. a: climate series, b: hydrography series, c: phytoplankton series, d: microzooplankton series; e: mesozooplankton series. The red line indicates the weighed means of the regimes determined with the Rodionov test (see Methods).

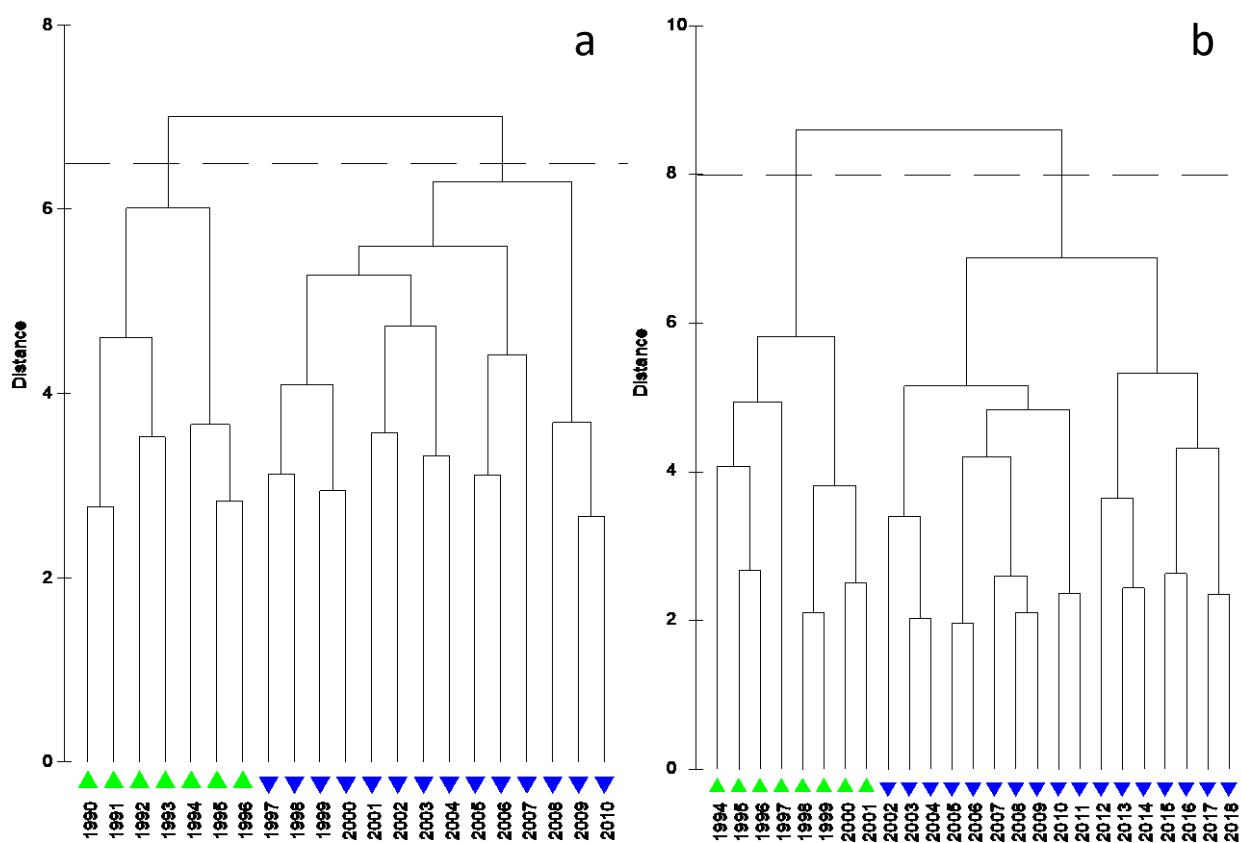

**Supplementary Figure S3.** Cluster of annual series of phytoplankton (a) or mesozooplankton taxa (b). The horizontal dashed line and the symbols indicate the main clusters indicated in Figure 5.
