# Supplementary material
Source: MDPI journal article supplement (https://www.mdpi.com/2673-1924/1/4/14)
Supplement: s1 [file s1]

**Supplementary Table S2.** List of original series of plankton taxa along with mean, sd and trends. The number used to identify the series in the text and figures is also indicated. S and Z: statistics of the Mann-Kendall trend test. Significant ( $p < 0.05$ ) values were marked with a yellow background.

| series        | series no. | variable  | units                 | mean   | se    | Mann-Kendall test |       |       | Content                                                                              |
|---------------|------------|-----------|-----------------------|--------|-------|-------------------|-------|-------|--------------------------------------------------------------------------------------|
|               |            |           |                       |        |       | S                 | Z     | p     |                                                                                      |
| Phytoplankton | 85         | Bact-deli | cell mL <sup>-1</sup> | 0.39   | 0.30  | -29               | 0.898 | 0.369 | <i>Bacteriastrum delicatulum</i> , Cleve, 1897                                       |
|               | 86         | Cerl-pela | cell mL <sup>-1</sup> | 1.75   | 0.94  | -16               | 0.453 | 0.651 | <i>Cerataulina pelagica</i> , (Cleve) Hendey, 1937                                   |
|               | 87         | Chae-affi | cell mL <sup>-1</sup> | 17.37  | 5.42  | 18                | 0.513 | 0.608 | <i>Chaetoceros affinis</i> , Lauder, 1864                                            |
|               | 88         | Chae-comp | cell mL <sup>-1</sup> | 4.31   | 1.04  | -2                | 0.030 | 0.976 | <i>Chaetoceros compressus</i> , Lauder, 1864                                         |
|               | 89         | Chae-debi | cell mL <sup>-1</sup> | 0.24   | 0.07  | -24               | 0.739 | 0.460 | <i>Chaetoceros debilis</i> , Cleve, 1894                                             |
|               | 90         | Chae-didy | cell mL <sup>-1</sup> | 3.28   | 0.76  | 2                 | 0.030 | 0.976 | <i>Chaetoceros didymus</i> , Ehrenberg, 1845                                         |
|               | 91         | Chae-grac | cell mL <sup>-1</sup> | 2.72   | 1.20  | -18               | 0.529 | 0.597 | <i>Chaetoceros gracilis</i> , Pantocsek, 1892                                        |
|               | 92         | Chae-soci | cell mL <sup>-1</sup> | 171.92 | 33.99 | -4                | 0.091 | 0.928 | <i>Chaetoceros socialis</i> , H.S.Lauder, 1864                                       |
|               | 93         | Dact-frag | cell mL <sup>-1</sup> | 3.35   | 1.45  | 11                | 0.302 | 0.763 | <i>Dactyliosolen fragilissimus</i> , (Bergon) Hasle apud G.R.Hasle & Syvertsen, 1996 |
|               | 94         | Dist-spec | cell mL <sup>-1</sup> | 0.28   | 0.06  | -4                | 0.091 | 0.928 | <i>Octactis speculum</i> , (Ehrenberg) F.H.Chang, J.M.Grieve & J.E.Sutherland, 2017  |
|               | 95         | Eutl-spp  | cell mL <sup>-1</sup> | 0.20   | 0.03  | -33               | 0.967 | 0.334 | <i>Eutreptiella</i> spp, A.da Cunha, 1914                                            |
|               | 96         | Guin-stri | cell mL <sup>-1</sup> | 1.86   | 0.81  | -22               | 0.634 | 0.526 | <i>Guinardia striata</i> , (Stolterfoth) Hasle, 1997                                 |
|               | 97         | Laud-annu | cell mL <sup>-1</sup> | 2.09   | 0.68  | -46               | 1.359 | 0.174 | <i>Lauderia annulata</i> , Cleve, 1873                                               |
|               | 98         | Neoc-line | cell mL <sup>-1</sup> | 0.46   | 0.39  | 1                 | 0.000 | 1.000 | <i>Triplos lineatus</i> , (Ehrenberg) F.Gómez, 2013                                  |
|               | 99         | Para-sulc | cell mL <sup>-1</sup> | 0.08   | 0.02  | -31               | 0.907 | 0.364 | <i>Paralia sulcata</i> , (Ehrenberg) Cleve, 1873                                     |
|               | 100        | Rhiz-imbr | cell mL <sup>-1</sup> | 0.38   | 0.05  | -6                | 0.151 | 0.880 | <i>Rhizosolenia imbricata</i> , Brightwell, 1858                                     |
|               | 101        | Skel-cost | cell mL <sup>-1</sup> | 16.32  | 9.23  | -84               | 2.506 | 0.012 | <i>Skeletonema costatum</i> , (Greville) Cleve, 1873                                 |

| series        | series no. | variable  | units                 | mean  | se    | Mann-Kendall test |       |       | Content                                                               |
|---------------|------------|-----------|-----------------------|-------|-------|-------------------|-------|-------|-----------------------------------------------------------------------|
|               |            |           |                       |       |       | S                 | Z     | p     |                                                                       |
| Phytoplankton | 102        | Thal-anta | cell mL <sup>-1</sup> | 2.52  | 0.85  | -26               | 0.755 | 0.450 | <i>Thalassiosira antarctica</i> , Comber, 1896                        |
|               | 103        | Asto-glac | cell mL <sup>-1</sup> | 6.45  | 2.63  | 18                | 0.513 | 0.608 | <i>Asterionellopsis glacialis</i> , (Castracane) Round, 1990          |
|               | 104        | Chae-cost | cell mL <sup>-1</sup> | 0.41  | 0.16  | -8                | 0.218 | 0.827 | <i>Chaetoceros costatus</i> , Pavillard, 1911                         |
|               | 105        | Chae-curv | cell mL <sup>-1</sup> | 3.54  | 2.16  | 69                | 2.054 | 0.040 | <i>Chaetoceros curvisetus</i> , Cleve, 1889                           |
|               | 106        | Chae-deci | cell mL <sup>-1</sup> | 0.58  | 0.16  | -65               | 1.934 | 0.053 | <i>Chaetoceros decipiens</i> , Cleve, 1873                            |
|               | 107        | Chae-simp | cell mL <sup>-1</sup> | 1.82  | 1.40  | 16                | 0.521 | 0.602 | <i>Chaetoceros simplex</i> , Ostensfeld, 1902                         |
|               | 108        | Chae-spp  | cell mL <sup>-1</sup> | 22.36 | 4.82  | 88                | 2.627 | 0.009 | <i>Chaetoceros</i> spp, Ehrenberg, 1844                               |
|               | 109        | Deto-pumi | cell mL <sup>-1</sup> | 7.14  | 1.72  | -64               | 1.902 | 0.057 | <i>Detonula pumila</i> , (Castracane) Gran, 1900                      |
|               | 110        | Dict-fibu | cell mL <sup>-1</sup> | 0.12  | 0.03  | 64                | 1.902 | 0.057 | <i>Dictyocha fibula</i> , Ehrenberg, 1839                             |
|               | 111        | Dino-acum | cell mL <sup>-1</sup> | 0.10  | 0.03  | 34                | 0.997 | 0.319 | <i>Dinophysis acuminata</i> , Claparède & Lachmann, 1859              |
|               | 112        | Guin-deli | cell mL <sup>-1</sup> | 8.42  | 2.13  | -6                | 0.151 | 0.880 | <i>Guinardia delicatula</i> , (Cleve) Hasle, 1997                     |
|               | 113        | Kato-glau | cell mL <sup>-1</sup> | 1.27  | 0.67  | 72                | 2.144 | 0.032 | <i>Katodinium glaucum</i> , (Lebour) Loeblich III, 1965               |
|               | 114        | Lept-dani | cell mL <sup>-1</sup> | 81.96 | 35.67 | -5.0              | 0.121 | 0.904 | <i>Leptocylindrus danicus</i> , Cleve, 1889                           |
|               | 115        | Lept-mini | cell mL <sup>-1</sup> | 4.44  | 1.25  | 50.0              | 1.480 | 0.139 | <i>Leptocylindrus minimus</i> , Gran, 1915                            |
|               | 116        | Navi-tran | cell mL <sup>-1</sup> | 0.66  | 0.07  | 124.0             | 3.714 | 0.000 | <i>Navicula transitans</i> , Cleve, 1883                              |
|               | 117        | Neoc-furc | cell mL <sup>-1</sup> | 0.07  | 0.01  | 6.0               | 0.151 | 0.880 | <i>Tripos furca</i> , (Ehrenberg) F.Gómez, 2013                       |
|               | 118        | Neoc-fusu | cell mL <sup>-1</sup> | 0.05  | 0.01  | -22.0             | 0.634 | 0.526 | <i>Tripos fusus</i> , (Ehrenberg) F.Gómez, 2013                       |
|               | 119        | Nitz-long | cell mL <sup>-1</sup> | 13.61 | 4.98  | 54                | 1.600 | 0.110 | <i>Nitzschia longissima</i> , (Brébisson) Ralfs, 1861                 |
|               | 120        | Nitz-spp  | cell mL <sup>-1</sup> | 0.98  | 0.24  | 28                | 0.819 | 0.413 | <i>Nitzschia</i> spp, Hassall, 1845                                   |
|               | 121        | Phae-pouc | cell mL <sup>-1</sup> | 9.52  | 2.95  | -12               | 0.332 | 0.740 | <i>Phaeocystis pouchetii</i> , (M.P. Hariot, 1892) G. Lagerheim, 1896 |

| series        | series no. | variable  | units                 | mean  | se    | Mann-Kendall test |       |       | Content                                                                                      |
|---------------|------------|-----------|-----------------------|-------|-------|-------------------|-------|-------|----------------------------------------------------------------------------------------------|
|               |            |           |                       |       |       | S                 | Z     | p     |                                                                                              |
| Phytoplankton | 122        | Prob-alat | cell mL <sup>-1</sup> | 1.66  | 0.42  | 58                | 1.721 | 0.085 | <i>Proboscia alata</i> , (Brightwell) Sundström, 1986                                        |
|               | 123        | Pror-balt | cell mL <sup>-1</sup> | 3.32  | 1.46  | 66                | 1.963 | 0.050 | <i>Prorocentrum balticum</i> , (Lohmann, 1908) Loeblich, 1970 [Krakhmalny & Terenko, (2002)] |
|               | 124        | Pror-mica | cell mL <sup>-1</sup> | 0.97  | 0.68  | 38                | 1.117 | 0.264 | <i>Prorocentrum micans</i> , Ehrenberg, 1834                                                 |
|               | 125        | Prot-bipe | cell mL <sup>-1</sup> | 0.16  | 0.02  | 44                | 1.299 | 0.194 | <i>Protoperidinium bipes</i> , (Paulsen, 1904) Balech, 1974                                  |
|               | 126        | Psen-deli | cell mL <sup>-1</sup> | 9.62  | 2.65  | 80                | 2.386 | 0.017 | <i>Pseudo-nitzschia delicatissima</i> , (P.T. Cleve, 1897) Heiden, 1928                      |
|               | 127        | Psen-pung | cell mL <sup>-1</sup> | 21.16 | 4.15  | -52               | 1.540 | 0.124 | <i>Pseudo-nitzschia pungens</i> , (Grunow ex P.T. Cleve, 1897) Hasle, 1993                   |
|               | 128        | Rhiz-seti | cell mL <sup>-1</sup> | 1.25  | 0.65  | -44               | 1.300 | 0.194 | <i>Rhizosolenia setigera</i> , Brightwell, 1858                                              |
|               | 129        | Scri-troc | cell mL <sup>-1</sup> | 1.55  | 0.41  | 31                | 0.906 | 0.365 | <i>Scrippsiella trochoidea</i> , (Stein) Balech ex Loeblich III, 1965                        |
|               | 130        | Thal-anli | cell mL <sup>-1</sup> | 0.28  | 0.10  | 12                | 0.333 | 0.739 | <i>Thalassiosira anguste-lineata</i> , (A.Schmidt) G.Fryxell & Hasle, 1977                   |
|               | 131        | Thal-anlt | cell mL <sup>-1</sup> | 0.84  | 0.29  | 86                | 2.567 | 0.010 | <i>Thalassiosira angulata</i> , (W.Gregory) Hasle, 1978                                      |
|               | 132        | Thal-leva | cell mL <sup>-1</sup> | 13.92 | 10.83 | 90                | 2.688 | 0.007 | <i>Thalassiosira levanderi</i> , van Goor, 1924                                              |
|               | 133        | Thal-oest | cell mL <sup>-1</sup> | 0.99  | 0.40  | -47               | 1.407 | 0.159 | <i>Thalassiosira oestrupii</i> , (Ostenfeld) Hasle, 1972                                     |
|               | 134        | Thal-rotu | cell mL <sup>-1</sup> | 1.57  | 0.49  | -6                | 0.151 | 0.880 | <i>Thalassiosira rotula</i> , Meunier, 1910                                                  |
|               | 135        | Than-nitz | cell mL <sup>-1</sup> | 2.17  | 0.49  | 46                | 1.359 | 0.174 | <i>Thalassionema nitzschioides</i> , (Grunow) Mereschowsky, 1902                             |
|               | 136        | Toro-robu | cell mL <sup>-1</sup> | 0.40  | 0.05  | 94                | 2.808 | 0.005 | <i>Torodinium robustum</i> , Kofoed & Swezy, 1921                                            |
|               | 137        | Gyro-spir | cell mL <sup>-1</sup> | 0.33  | 0.04  | 80                | 2.386 | 0.017 | <i>Gyrodinium spirale</i> , (Bergh, 1881) Kofoed & Swezy, 1921                               |
|               | 138        | Hete-niei | cell mL <sup>-1</sup> | 6.86  | 1.49  | 70                | 2.084 | 0.037 | <i>Heterocapsa niei</i> , (Loeblich III, 1968) Morrill & Loeblich III, 1981                  |

| series          | series no. | variable  | units                  | mean   | se    | Mann-Kendall test |       |       | Content                                              |
|-----------------|------------|-----------|------------------------|--------|-------|-------------------|-------|-------|------------------------------------------------------|
|                 |            |           |                        |        |       | S                 | Z     | p     |                                                      |
| Mesozooplankton | 139        | Peni-avir | indiv. m <sup>-3</sup> | 0.17   | 0.07  | -90               | 2.130 | 0.033 | <i>Penilia avirostris</i> , Dana, 1849               |
|                 | 140        | Podo-inte | indiv. m <sup>-3</sup> | 101.70 | 11.92 | 96                | 1.782 | 0.075 | <i>Podon intermedius</i> , Lilljeborg, 1853          |
|                 | 141        | Evad-nord | indiv. m <sup>-3</sup> | 67.91  | 10.38 | 54                | 0.994 | 0.320 | <i>Evadne nordmanni</i> , Lovén, 1836                |
|                 | 142        | Evad-spin | indiv. m <sup>-3</sup> | 7.82   | 4.14  | 170               | 3.223 | 0.001 | <i>Evadne spinifera</i> , P.E.Müller, 1867           |
|                 | 143        | Cent-ch_a | indiv. m <sup>-3</sup> | 30.46  | 4.44  | -94               | 2.172 | 0.030 | <i>Centropages chierchiae</i> , Giesbrecht, 1889     |
|                 | 144        | Cten-vanu | indiv. m <sup>-3</sup> | 18.96  | 2.74  | -156              | 3.620 | 0.000 | <i>Ctenocalanus vanus</i> , Giesbrecht, 1888         |
|                 | 145        | Isia-clav | indiv. m <sup>-3</sup> | 1.46   | 0.59  | -110              | 2.612 | 0.009 | <i>Isias clavipes</i> , Boeck, 1865                  |
|                 | 146        | Oith-plum | indiv. m <sup>-3</sup> | 30.06  | 5.10  | -100              | 2.312 | 0.021 | <i>Oithona plumifera</i> , Baird, 1843               |
|                 | 147        | Temo-lo_a | indiv. m <sup>-3</sup> | 56.23  | 6.47  | -114              | 2.639 | 0.008 | <i>Temora longicornis</i> , (Müller O.F., 1785)      |
|                 | 148        | Temo-st_a | indiv. m <sup>-3</sup> | 9.14   | 2.47  | -115              | 2.663 | 0.008 | <i>Temora stylifera</i> , (Dana, 1849)               |
|                 | 149        | Acar-cl_a | indiv. m <sup>-3</sup> | 322.98 | 37.58 | 34                | 0.771 | 0.441 | <i>Acartia (Acartiura) clausi</i> , Giesbrecht, 1889 |
|                 | 150        | Aeti-arma | indiv. m <sup>-3</sup> | 0.35   | 0.18  | -23               | 0.583 | 0.560 | <i>Aetideus armatus</i> , Boeck, 1872                |
|                 | 151        | Cala-he_a | indiv. m <sup>-3</sup> | 20.12  | 2.93  | 49                | 1.121 | 0.262 | <i>Calanus helgolandicus</i> , Claus, 1863           |
|                 | 152        | Cald-ca_a | indiv. m <sup>-3</sup> | 20.29  | 3.17  | -20               | 0.444 | 0.657 | <i>Calanoides carinatus</i> , Krøyer, 1849           |
|                 | 153        | Calo-styl | indiv. m <sup>-3</sup> | 10.38  | 2.67  | -56               | 1.285 | 0.199 | <i>Calocalanus styliremis</i> , Giesbrecht, 1888     |
|                 | 154        | Cand-arma | indiv. m <sup>-3</sup> | 3.65   | 0.53  | 54                | 1.238 | 0.216 | <i>Candacia armata</i> , Boeck, 1872                 |
|                 | 155        | Clau-spp  | indiv. m <sup>-3</sup> | 93.12  | 10.79 | -58               | 1.331 | 0.183 | <i>Clausocalanus</i> spp, Giesbrecht, 1888           |
|                 | 156        | Clyt-rost | indiv. m <sup>-3</sup> | 1.30   | 0.27  | 21                | 0.467 | 0.640 | <i>Goniopsyllus rostratus</i> , Brady, 1883          |
|                 | 157        | Diai-pygm | indiv. m <sup>-3</sup> | 4.99   | 1.79  | -28               | 0.631 | 0.528 | <i>Diaxis pygmaea</i> , Corral-Estrada, 1972         |
|                 | 158        | Ditr-angl | indiv. m <sup>-3</sup> | 5.51   | 1.27  | -59               | 1.357 | 0.175 | <i>Ditrichocorycaeus anglicus</i> , (Lubbock, 1857)  |
|                 | 159        | Eute-acut | indiv. m <sup>-3</sup> | 11.31  | 2.03  | -4                | 0.070 | 0.944 | <i>Euterpina acutifrons</i> , (Dana, 1847)           |
|                 | 160        | Mecy-tenu | indiv. m <sup>-3</sup> | 0.37   | 0.09  | -36               | 0.847 | 0.397 | <i>Calocalanus tenuis</i> , Farran, 1926             |
|                 | 161        | Meso-te_a | indiv. m <sup>-3</sup> | 2.36   | 0.49  | -54               | 1.239 | 0.216 | <i>Mesocalanus tenuicornis</i> , Dana, 1849          |

| series           | series no. | variable   | units                  | mean   | se    | Mann-Kendall test |       |       | Content                                          |
|------------------|------------|------------|------------------------|--------|-------|-------------------|-------|-------|--------------------------------------------------|
|                  |            |            |                        |        |       | S                 | Z     | p     |                                                  |
| Meso zooplankton | 162        | Metr-luce  | indiv. m <sup>-3</sup> | 3.25   | 0.41  | -56               | 1.285 | 0.199 | <i>Metridia lucens</i> , Boeck, 1865             |
|                  | 163        | Mise-rose  | indiv. m <sup>-3</sup> | 1.03   | 0.31  | 30                | 0.683 | 0.495 | <i>Microsetella rosea</i> , (Dana, 1848)         |
|                  | 164        | Onca-medi  | indiv. m <sup>-3</sup> | 374.48 | 77.78 | 4                 | 0.070 | 0.944 | <i>Oncaea media</i> , Giesbrecht, 1891           |
|                  | 165        | Paca-pa_a  | indiv. m <sup>-3</sup> | 240.05 | 22.83 | -12               | 0.257 | 0.797 | <i>Paracalanus parvus</i> , (Claus, 1863)        |
|                  | 166        | Paeu-heb_a | indiv. m <sup>-3</sup> | 15.18  | 3.18  | -80               | 1.845 | 0.065 | <i>Paraeuchaeta hebes</i> , Giesbrecht, 1888     |
|                  | 167        | Pleu-grac  | indiv. m <sup>-3</sup> | 0.36   | 0.06  | -35               | 0.795 | 0.426 | <i>Pleuromamma gracilis</i> , (Claus, 1863)      |
|                  | 168        | Pseu-elon  | indiv. m <sup>-3</sup> | 146.78 | 28.44 | 26                | 0.584 | 0.559 | <i>Pseudocalanus elongatus</i> , (Boeck, 1865)   |
|                  | 169        | Sube-cras  | indiv. m <sup>-3</sup> | 1.70   | 0.41  | -46               | 1.054 | 0.292 | <i>Subeucalanus crassus</i> , (Giesbrecht, 1888) |
|                  | 170        | Cent-typi  | indiv. m <sup>-3</sup> | 7.19   | 1.72  | 130               | 3.017 | 0.003 | <i>Centropages typicus</i> , Krøyer, 1849        |
|                  | 171        | Cory-spp   | indiv. m <sup>-3</sup> | 0.84   | 0.34  | 107               | 2.808 | 0.005 | <i>Corycaeus</i> spp, Dana, 1845                 |
|                  | 172        | Oith-nana  | indiv. m <sup>-3</sup> | 21.63  | 4.60  | 89                | 2.056 | 0.040 | <i>Oithona nana</i> , Giesbrecht, 1893           |
|                  | 173        | Oith-simi  | indiv. m <sup>-3</sup> | 101.37 | 13.63 | 146               | 3.387 | 0.001 | <i>Oithona similis</i> , (Claus, 1863)           |
