# Supplementary material
Source: MDPI journal article supplement (https://www.mdpi.com/2673-1924/1/4/14)
Supplement: s1 [file s1]

Archive with 5 entries (5 files):
- Supplementary Table S2.pdf
- Supplementary Table S3.pdf
- Supplementary_Figures.pdf
- Supplementary information_index.pdf
- Supplementary Table S1.pdf
